# Supplementary material for: Which early life events or current environmental and lifestyle factors influence lung function in adolescents? – results from the GINIplus & LISAplus studies
Source: Springer Nature journal article supplement (doi:10.1186/s12931-017-0619-5), 2017-07-12
Supplement: MOESM1 [file 13298788]

## Additional file – Tables A1 to A6

**Table A1** Population characteristics of analyzed participants in comparison to the initial study population for the Munich and Wesel study centers

|                                                                | Study population<br>analyzed<br>(N=1326) | Study population<br>excluded<br>(N=6477) <sup>A</sup> | p-value* |
|----------------------------------------------------------------|------------------------------------------|-------------------------------------------------------|----------|
|                                                                | Mean (SD) or n/N (%)                     |                                                       |          |
| Sex                                                            |                                          |                                                       |          |
| male                                                           | 678/1326 (51)                            | 3267/6316 (52)                                        | 0.72     |
| female                                                         | 648/1326 (49)                            | 3049/6316 (48)                                        |          |
| Age at lung function measurement, years                        | 15.2 (0.3)                               | 15.3 (0.3)                                            | < 0.01   |
| Height at lung function measurement, cm                        | 171.5 (8.2)                              | 171.6 (8.5)                                           | 0.86     |
| <b>Study specific</b>                                          |                                          |                                                       |          |
| Study                                                          |                                          |                                                       |          |
| GINIplus control                                               | 508/1326 (38)                            | 3231/6477 (50)                                        | < 0.01   |
| GINIplus intervention                                          | 457/1326 (34)                            | 1795/6477 (28)                                        |          |
| LISAplus                                                       | 361/1326 (27)                            | 1451/6477 (22)                                        |          |
| Study center                                                   |                                          |                                                       |          |
| Munich                                                         | 840/1326 (63)                            | 3573/6477 (55)                                        | < 0.01   |
| Wesel                                                          | 486/1326 (37)                            | 2904/6477 (45)                                        |          |
| <b>Early life events</b>                                       |                                          |                                                       |          |
| Parental atopy, yes                                            | 780/1326 (59)                            | 3194/6276 (51)                                        | < 0.01   |
| Parental education                                             |                                          |                                                       |          |
| low (< 10 years of school)                                     | 69/1326 (5)                              | 827/6413 (13)                                         | < 0.01   |
| medium (= 10 years of school)                                  | 354/1326 (27)                            | 1775/6413 (28)                                        |          |
| high (> 10 years of school)                                    | 903/1326 (68)                            | 3811/6413 (59)                                        |          |
| Maternal age at delivery >31 years, yes                        | 662/1326 (50)                            | 2897/6461 (45)                                        | < 0.01   |
| Maternal smoking during pregnancy, yes                         | 159/1326 (12)                            | 1069/5657 (19)                                        | < 0.01   |
| Early second-hand smoke exposure at home<br>(up to age 4), yes | 433/1326 (33)                            | 2117/4448 (48)                                        | < 0.01   |
| Season of birth, winter                                        | 339/1326 (26)                            | 1702/6477 (26)                                        | 0.61     |
| Birth weight, g                                                | 3482.7 (442.0)                           | 3463.7 (461.3)                                        | 0.17     |
| Exclusive breastfeeding > 4 months, yes                        | 804/1326 (61)                            | 2498/4957 (50)                                        | < 0.01   |
| Peak weight velocity, kg/month                                 | 1.06 (0.22)                              | 1.09 (0.23)                                           | < 0.01   |
| Peak height velocity, cm/month                                 | 3.62 (0.42)                              | 3.67 (0.42)                                           | < 0.01   |
| Lung infections (up to age 3), yes                             | 414/1326 (31)                            | 1371/4230 (32)                                        | 0.44     |

|                                                              | Study population<br>analyzed<br>(N=1326) | Study population<br>excluded<br>(N=6477) <sup>A</sup> | p-value* |
|--------------------------------------------------------------|------------------------------------------|-------------------------------------------------------|----------|
|                                                              | Mean (SD) or n/N (%)                     |                                                       |          |
| <b>Environmental and lifestyle factors at age 15</b>         |                                          |                                                       |          |
| Short-term air pollution at lung function measurement        |                                          |                                                       |          |
| NO <sub>2</sub> (µg/m <sup>3</sup> )                         | 20.4 (6.9)                               | 20.4 (6.7)                                            | 0.83     |
| PM <sub>2.5</sub> mass (µg/m <sup>3</sup> )                  | 14.6 (7.3)                               | 15.7 (7.2)                                            | < 0.01   |
| PM <sub>10</sub> mass (µg/m <sup>3</sup> )                   | 18.9 (7.8)                               | 20.1 (7.8)                                            | < 0.01   |
| Long-term air pollution at participant's home address        |                                          |                                                       |          |
| NO <sub>2</sub> (µg/m <sup>3</sup> )                         | 21.2 (4.8)                               | 22.0 (4.4)                                            | < 0.01   |
| PM <sub>2.5</sub> mass (µg/m <sup>3</sup> )                  | 14.8 (2.1)                               | 15.5 (2.2)                                            | < 0.01   |
| PM <sub>10</sub> mass (µg/m <sup>3</sup> )                   | 22.1 (3.2)                               | 22.9 (3.3)                                            | < 0.01   |
| Regular indoor second-hand smoke exposure <sup>1</sup> , yes | 266/1326 (20)                            | 438/2242 (20)                                         | 0.74     |
| Active smoking, yes                                          | 71/1326 (5)                              | 165/2246 (7)                                          | 0.02     |
| Serum vitamin D concentration <sup>2</sup> , nmol/l          | 68.4 (25.3)                              | 66.3 (24.1)                                           | 0.07     |
| Body mass index, kg/m <sup>2</sup>                           | 20.7 (3)                                 | 21.2 (3.5)                                            | < 0.01   |
| <b>Allergic diseases at age 15</b>                           |                                          |                                                       |          |
| Asthma, yes                                                  | 83/1326 (6)                              | 145/2938 (5)                                          | 0.09     |
| Rhinitis, yes                                                | 251/1326 (19)                            | 491/2839 (17)                                         | 0.21     |
| Sensitization to                                             |                                          |                                                       |          |
| Aeroallergens, yes                                           | 602/1326 (45)                            | 560/1199 (47)                                         | 0.54     |
| Food allergens, yes                                          | 148/1326 (11)                            | 144/1199 (12)                                         | 0.55     |

<sup>A</sup>Only participants from the Munich and Wesel study centers. \*t-test, Wilcoxon rank-sum test or Pearson's chi-square test. <sup>1</sup>at least once a week or more. <sup>2</sup>season-adjusted 25(OH)D concentration.

**Table A2** Characteristics of lung function parameters of analyzed participants in comparison to all other subjects with valid lung function measurements at age 15 in the Munich and Wesel study centers

| Spirometric parameter      | Males                                |                                                   | Females                              |                                                   |
|----------------------------|--------------------------------------|---------------------------------------------------|--------------------------------------|---------------------------------------------------|
|                            | Study population analyzed<br>(N=678) | Study population excluded<br>(N=470) <sup>A</sup> | Study population analyzed<br>(N=648) | Study population excluded<br>(N=562) <sup>A</sup> |
|                            | Mean (SD)                            |                                                   | Mean (SD)                            |                                                   |
| FVC, l                     | 4.50 (0.74)                          | 4.53 (0.77)                                       | 3.64 (0.51)                          | 3.65 (0.49)                                       |
| FEV <sub>1</sub> , l       | 3.83 (0.64)                          | 3.82 (0.67)                                       | 3.19 (0.42)                          | 3.22 (0.42)                                       |
| FEV <sub>1</sub> /FVC, %   | 85.33 (6.43)*                        | 84.46 (6.37)                                      | 88.12 (6.02)                         | 88.39 (5.99)                                      |
| FEF <sub>25-75</sub> , l/s | 4.12 (1.01)                          | 4.03 (1.04)                                       | 3.70 (0.77)                          | 3.77 (0.82)                                       |
| PEF, l/s                   | 7.73 (1.3)                           | 7.64 (1.34)                                       | 6.54 (0.93)                          | 6.55 (0.98)                                       |
| FEF <sub>25</sub> , l/s    | 6.61 (1.27)                          | 6.46 (1.32)                                       | 5.89 (0.92)                          | 5.92 (0.99)                                       |
| FEF <sub>50</sub> , l/s    | 4.71 (1.14)                          | 4.58 (1.14)                                       | 4.19 (0.87)                          | 4.29 (0.94)                                       |
| FEF <sub>75</sub> , l/s    | 2.31 (0.78)                          | 2.26 (0.80)                                       | 2.11 (0.63)                          | 2.15 (0.64)                                       |

\*Significant difference in lung function parameter between participants analyzed and those excluded, stratified by sex (t-test,  $p < 0.05$ ). <sup>A</sup>Participants with valid lung function measurements at age 15 from the Munich and Wesel study centers.

FEV<sub>1</sub>: forced expiratory volume in 1 second. FVC: forced vital capacity. FEF<sub>25</sub>, FEF<sub>50</sub>, FEF<sub>75</sub>: forced expiratory flow rates at 25, 50 and 75% of exhaled FVC. FEF<sub>25-75</sub>: mean flow rate between 25 and 75% of FVC. PEF: peak expiratory flow. SD: standard deviation.

**Table A3** Coefficients (95% confidence intervals) of regression models with the lowest Mallows' Cp, determined by best subset selection in the total population

| Spirometric parameter<br>indicative of                            | Lung volume           | Airways &<br>volume    | Airflow<br>limitation    | Airways                     | Function of<br>larger conducting airways |                          | peripheral airways       |                          |
|-------------------------------------------------------------------|-----------------------|------------------------|--------------------------|-----------------------------|------------------------------------------|--------------------------|--------------------------|--------------------------|
|                                                                   | FVC, ml               | FEV <sub>1</sub> , ml  | FEV <sub>1</sub> /FVC, % | FEF <sub>25-75</sub> , ml/s | PEF, ml/s                                | FEF <sub>25</sub> , ml/s | FEF <sub>50</sub> , ml/s | FEF <sub>75</sub> , ml/s |
| Sex, male                                                         | <b>349 (291, 406)</b> | <b>217 (164, 270)</b>  | <b>-2 (-2.8, -1.1)</b>   | <b>118 (1, 234)</b>         | <b>607 (473, 740)</b>                    | <b>274 (140, 409)</b>    | <b>229 (99, 360)</b>     |                          |
| Age, IQR years                                                    | <b>49 (27, 70)</b>    | <b>34 (14, 54)</b>     |                          | 31 (-10, 71)                | 45 (-4, 93)                              | <b>72 (22, 123)</b>      | 42 (-4, 88)              |                          |
| Height, IQR cm                                                    | <b>646 (606, 687)</b> | <b>519 (483, 555)</b>  | -0.4 (-1, 0.1)           | <b>467 (389, 545)</b>       | <b>709 (619, 799)</b>                    | <b>560 (469, 651)</b>    | <b>482 (394, 571)</b>    | <b>330 (274, 385)</b>    |
| <b>Early life events</b>                                          |                       |                        |                          |                             |                                          |                          |                          |                          |
| Parental atopy, yes                                               |                       |                        | <b>-0.7 (-1.4, -0.1)</b> | -77 (-172, 18)              | <b>-124 (-238, -10)</b>                  |                          |                          | -67 (-142, 9)            |
| Parental education <sup>#</sup>                                   |                       |                        |                          |                             |                                          |                          |                          |                          |
| high                                                              |                       | <b>-51 (-100, -2)</b>  |                          | -90 (-193, 12)              | <b>-154 (-282, -25)</b>                  | -118 (-243, 7)           | -114 (-229, 2)           |                          |
| low                                                               |                       |                        |                          |                             | -193 (-454, 67)                          |                          |                          |                          |
| Early second-hand smoke<br>exposure at home (up to age 4),<br>yes |                       |                        |                          |                             |                                          | <b>133 (7, 258)</b>      |                          |                          |
| Season of birth, winter                                           | 46 (-8, 100)          |                        |                          |                             |                                          |                          |                          |                          |
| Birth weight, IQR g                                               | -33 (-66, 1)          |                        |                          |                             |                                          |                          |                          |                          |
| Peak weight velocity, IQR<br>kg/month                             |                       |                        | <b>-0.7 (-1.2, -0.2)</b> | <b>-110 (-180, -40)</b>     |                                          |                          | <b>-120 (-200, -41)</b>  | <b>-89 (-143, -35)</b>   |
| Lung infections (up to age 3), yes                                |                       | <b>-54 (-101, -6)</b>  | <b>-1.0 (-1.7, -0.3)</b> | <b>-161 (-260, -62)</b>     | <b>-131 (-249, -12)</b>                  | <b>-143 (-263, -23)</b>  | <b>-169 (-281, -57)</b>  | <b>-117 (-196, -38)</b>  |
| <b>Environment &amp; lifestyle at age 15</b>                      |                       |                        |                          |                             |                                          |                          |                          |                          |
| Long term air pollution                                           |                       |                        |                          |                             |                                          |                          |                          |                          |
| NO <sub>2</sub> , IQR µg/m <sup>3</sup>                           |                       |                        | -0.4 (-0.9, 0.1)         |                             |                                          |                          |                          | -43 (-98, 12)            |
| PM <sub>2.5</sub> mass, IQR µg/m <sup>3</sup>                     | 86 (-29, 201)         |                        |                          |                             |                                          |                          |                          |                          |
| Regular indoor second-hand<br>smoke exposure <sup>1</sup> , yes   |                       | <b>-65 (-120, -10)</b> | <b>-0.8 (-1.6, 0)</b>    | <b>-132 (-246, -17)</b>     | <b>-177 (-315, -40)</b>                  | -137 (-278, 5)           | -124 (-254, 6)           | <b>-126 (-217, -35)</b>  |

| Spirometric parameter indicative of                     | Lung volume             | Airways & volume        | Airflow limitation       | Airways                     | Function of larger conducting airways |                          | peripheral airways       |                          |
|---------------------------------------------------------|-------------------------|-------------------------|--------------------------|-----------------------------|---------------------------------------|--------------------------|--------------------------|--------------------------|
|                                                         | FVC, ml                 | FEV <sub>1</sub> , ml   | FEV <sub>1</sub> /FVC, % | FEF <sub>25-75</sub> , ml/s | PEF, ml/s                             | FEF <sub>25</sub> , ml/s | FEF <sub>50</sub> , ml/s | FEF <sub>75</sub> , ml/s |
| Serum vitamin D concentration <sup>2</sup> , IQR nmol/L | <b>63 (32, 94)</b>      | <b>31 (3, 60)</b>       | <b>-0.6 (-1, -0.2)</b>   |                             |                                       |                          |                          |                          |
| Body mass index, IQR kg/m <sup>2</sup>                  | <b>226 (197, 254)</b>   | <b>142 (116, 169)</b>   | <b>-1.2 (-1.6, -0.8)</b> | <b>93 (38, 149)</b>         | <b>261 (195, 327)</b>                 | <b>227 (161, 294)</b>    | <b>149 (86, 211)</b>     |                          |
| <b>Allergic diseases at age 15</b>                      |                         |                         |                          |                             |                                       |                          |                          |                          |
| Asthma, yes                                             | <b>-119 (-216, -22)</b> | <b>-178 (-269, -88)</b> | <b>-2 (-3.4, -0.6)</b>   | <b>-346 (-538, -154)</b>    | -198 (-434, 38)                       | <b>-398 (-627, -168)</b> | <b>-405 (-620, -190)</b> | <b>-193 (-346, -40)</b>  |
| Rhinitis, yes                                           |                         |                         |                          |                             | 119 (-28, 265)                        |                          |                          |                          |
| Aeroallergen sensitization, yes                         |                         |                         | 0.6 (-0.1, 1.3)          | 78 (-17, 172)               |                                       |                          |                          | 70 (-5, 144)             |
| <b>Study specific</b>                                   |                         |                         |                          |                             |                                       |                          |                          |                          |
| Study group <sup>#</sup>                                |                         |                         |                          |                             |                                       |                          |                          |                          |
| GINIplus (intervention)                                 | 49 (-7, 105)            |                         |                          |                             |                                       |                          |                          |                          |
| LISAplus                                                | <b>97 (34, 160)</b>     | 45 (-6, 97)             |                          |                             |                                       | 121 (-9, 252)            |                          |                          |
| Study center, Wesel                                     | <b>-145 (-276, -15)</b> | <b>-138 (-188, -87)</b> | <b>-1.3 (-2.1, -0.6)</b> | <b>-266 (-368, -164)</b>    | <b>-325 (-446, -204)</b>              | <b>-334 (-462, -206)</b> | <b>-282 (-396, -168)</b> | <b>-179 (-263, -95)</b>  |

Significant associations are shown in bold (p<0.05). Estimates for continuous variables are presented per interquartile range (IQR) increase (IQR: age (0.26 years), height (11 cm), birth weight (587.5 g), peak weight velocity (0.28 kg/month), long term NO<sub>2</sub> (6.64 µg/m<sup>3</sup>), long term PM 2.5 mass (4.00 µg/m<sup>3</sup>), vitamin D concentration (32.35 nmol/l), body mass index (3.56 kg/m<sup>2</sup>).

<sup>#</sup>Factor entered using dummy coding. <sup>1</sup>at least once a week or more. <sup>2</sup>season-adjusted 25(OH)D concentration.

FEV<sub>1</sub>: forced expiratory volume in 1 second. FVC: forced vital capacity. FEF<sub>25</sub>, FEF<sub>50</sub>, FEF<sub>75</sub>: forced expiratory flow rates at 25, 50 and 75% of exhaled FVC. FEF<sub>25-75</sub>: mean flow rate between 25 and 75% of FVC. PEF: peak expiratory flow.

**Table A4** Distribution of the frequency of inclusion of each factor in 1000 replication analyses (%)

| Spirometric parameter                                       | FVC | FEV <sub>1</sub> | FEV <sub>1</sub> /FVC | FEF <sub>25-75</sub> | PEF | FEF <sub>25</sub> | FEF <sub>50</sub> | FEF <sub>75</sub> |
|-------------------------------------------------------------|-----|------------------|-----------------------|----------------------|-----|-------------------|-------------------|-------------------|
| Sex, male                                                   | 100 | 100              | 100                   | 62                   | 100 | 100               | 98                | 2                 |
| Age, years                                                  | 100 | 98               | 14                    | 35                   | 51  | 90                | 54                | 23                |
| Height, cm                                                  | 100 | 100              | 42                    | 100                  | 100 | 100               | 100               | 100               |
| <b>Early life events</b>                                    |     |                  |                       |                      |     |                   |                   |                   |
| Parental atopy, yes                                         | 10  | 26               | 54                    | 38                   | 72  | 11                | 31                | 36                |
| Parental education <sup>#</sup>                             |     |                  |                       |                      |     |                   |                   |                   |
| high                                                        | 12  | 52               | 20                    | 50                   | 57  | 52                | 49                | 34                |
| low                                                         | 15  | 10               | 3                     | 3                    | 31  | 8                 | 8                 | 3                 |
| Maternal age at delivery >31 years, yes                     | 7   | 3                | 20                    | 17                   | 12  | 8                 | 13                | 16                |
| Maternal smoking during pregnancy, yes                      | 29  | 23               | 3                     | 1                    | 5   | 6                 | 3                 | 1                 |
| Early second-hand smoke exposure at home (up to age 4), yes | 16  | 10               | 2                     | 1                    | 31  | 66                | 2                 | 1                 |
| Season of birth, winter                                     | 43  | 18               | 1                     | 2                    | 10  | 9                 | 2                 | 10                |
| Birth weight, g                                             | 44  | 8                | 5                     | 4                    | 18  | 11                | 20                | 10                |
| Exclusive breastfeeding > 4 months, no                      | 3   | 2                | 2                     | 3                    | 19  | 4                 | 6                 | 2                 |
| Peak weight velocity, kg/month                              | 3   | 22               | 93                    | 92                   | 1   | 25                | 95                | 97                |
| Peak height velocity, cm/month                              | 23  | 18               | 3                     | 4                    | 12  | 3                 | 4                 | 11                |
| Lung infections (up to age 3), yes                          | 6   | 73               | 94                    | 98                   | 74  | 80                | 95                | 95                |
| <b>Environment &amp; lifestyle at age 15</b>                |     |                  |                       |                      |     |                   |                   |                   |
| Short-term air pollution                                    |     |                  |                       |                      |     |                   |                   |                   |
| NO <sub>2</sub> (µg/m <sup>3</sup> )                        | 2   | 4                | 17                    | 24                   | 7   | 4                 | 41                | 13                |
| PM <sub>2.5</sub> mass (µg/m <sup>3</sup> )                 | 4   | 4                | 11                    | 9                    | 4   | 3                 | 12                | 3                 |
| PM <sub>10</sub> mass (µg/m <sup>3</sup> )                  | 9   | 1                | 39                    | 12                   | 3   | 2                 | 17                | 10                |

| Spirometric parameter                                        | FVC | FEV <sub>1</sub> | FEV <sub>1</sub> /FVC | FEF <sub>25-75</sub> | PEF | FEF <sub>25</sub> | FEF <sub>50</sub> | FEF <sub>75</sub> |
|--------------------------------------------------------------|-----|------------------|-----------------------|----------------------|-----|-------------------|-------------------|-------------------|
| Long-term air pollution                                      |     |                  |                       |                      |     |                   |                   |                   |
| NO <sub>2</sub> (µg/m <sup>3</sup> )                         | 6   | 19               | 31                    | 27                   | 19  | 6                 | 28                | 24                |
| PM <sub>2.5</sub> mass (µg/m <sup>3</sup> )                  | 36  | 31               | 24                    | 10                   | 21  | 8                 | 10                | 9                 |
| PM <sub>10</sub> mass (µg/m <sup>3</sup> )                   | 8   | 4                | 8                     | 9                    | 16  | 3                 | 13                | 20                |
| Regular indoor second-hand smoke exposure <sup>1</sup> , yes | 21  | 80               | 66                    | 70                   | 86  | 54                | 51                | 95                |
| Active smoking, yes                                          | 9   | 12               | 7                     | 7                    | 21  | 8                 | 6                 | 9                 |
| Serum vitamin D concentration <sup>2</sup> , nmol/l          | 100 | 74               | 85                    | 1                    | 16  | 2                 | 4                 | 32                |
| Body mass index, kg/m <sup>2</sup>                           | 100 | 100              | 100                   | 97                   | 100 | 100               | 100               | 8                 |
| <b>Allergic diseases at age 15</b>                           |     |                  |                       |                      |     |                   |                   |                   |
| Asthma, yes                                                  | 79  | 99               | 84                    | 97                   | 39  | 97                | 99                | 79                |
| Rhinitis, yes                                                | 7   | 5                | 6                     | 8                    | 31  | 3                 | 10                | 5                 |
| Sensitization to                                             |     |                  |                       |                      |     |                   |                   |                   |
| Aeroallergens, yes                                           | 1   | 11               | 41                    | 44                   | 4   | 2                 | 32                | 45                |
| Food allergens, yes                                          | 3   | 2                | 4                     | 4                    | 3   | 8                 | 5                 | 2                 |
| <b>Study specific</b>                                        |     |                  |                       |                      |     |                   |                   |                   |
| Study group <sup>#</sup>                                     |     |                  |                       |                      |     |                   |                   |                   |
| GINIplus (intervention)                                      | 53  | 17               | 7                     | 6                    | 13  | 6                 | 3                 | 4                 |
| LISAplus                                                     | 90  | 54               | 16                    | 3                    | 4   | 53                | 7                 | 10                |
| Study center, Wesel                                          | 82  | 99               | 63                    | 86                   | 99  | 99                | 83                | 78                |

Factors that were included in >70% of replication analyses are shaded in gray.

<sup>#</sup>Factor entered using dummy coding. <sup>1</sup>at least once a week or more. <sup>2</sup>season-adjusted 25(OH)D concentration. FEV<sub>1</sub>: forced expiratory volume in 1 second. FVC: forced vital capacity. FEF<sub>25</sub>, FEF<sub>50</sub>, FEF<sub>75</sub>: forced expiratory flow rates at 25, 50 and 75% of exhaled FVC. FEF<sub>25-75</sub>: mean flow rate between 25 and 75% of FVC. PEF: peak expiratory flow.

**Table A5** Coefficients (95% confidence intervals) of regression models of flow rates adjusted for covariates that remained stable in replication analyses

| Spirometric parameter<br>indicative of airway function of       | larger conducting airways |                          | peripheral airways       |                          |
|-----------------------------------------------------------------|---------------------------|--------------------------|--------------------------|--------------------------|
|                                                                 | PEF, ml/s                 | FEF <sub>25</sub> , ml/s | FEF <sub>50</sub> , ml/s | FEF <sub>75</sub> , ml/s |
| Sex, male                                                       | 602 (470, 735)            | 285 (150, 420)           | 227 (97, 358)            |                          |
| Age, IQR years                                                  |                           | 63 (14, 112)             |                          |                          |
| Height, IQR cm                                                  | 713 (623, 803)            | 555 (464, 646)           | 488 (399, 576)           | 328 (272, 383)           |
| <b>Early life events</b>                                        |                           |                          |                          |                          |
| Parental atopy, yes                                             | -123 (-236, -11)          |                          |                          |                          |
| Peak weight velocity, IQR<br>kg/month                           |                           |                          | -122 (-202, -43)         | -82 (-136, -28)          |
| Lung infections (up to age 3), yes                              | -140 (-258, -23)          | -150 (-270, -29)         | -171 (-283, -58)         | -118 (-198, -39)         |
| <b>Environment &amp; lifestyle at age 15</b>                    |                           |                          |                          |                          |
| Regular indoor second-hand<br>smoke exposure <sup>1</sup> , yes | -164 (-301, -27)          |                          |                          | -130 (-220, -39)         |
| Serum vitamin D concentration <sup>2</sup> ,<br>IQR nmol/l      |                           |                          |                          |                          |
| Body mass index, IQR kg/m <sup>2</sup>                          | 265 (200, 331)            | 231 (165, 297)           | 149 (87, 212)            |                          |
| <b>Allergic diseases at age 15</b>                              |                           |                          |                          |                          |
| Asthma, yes                                                     |                           | -391 (-621,-161)         | -392 (-607,-177)         | -171 (-323, -20)         |
| <b>Study specific</b>                                           |                           |                          |                          |                          |
| Study center (Wesel vs Munich)                                  | -314 (-430,-198)          | -303 (-419,-186)         | -266 (-375,-157)         | -201 (-277,-125)         |

All associations were statistically significant ( $p < 0.05$ ). Estimates for continuous variables are presented per interquartile range (IQR) increase (IQR: age (0.26 years), height (11 cm), peak weight velocity (0.28 kg/month), vitamin D (32.35 nmol/l), body mass index (3.56 kg/m<sup>2</sup>)).

<sup>1</sup>at least once a week or more. <sup>2</sup>season-adjusted 25(OH)D concentration.

FEF<sub>25</sub>, FEF<sub>50</sub>, FEF<sub>75</sub>: forced expiratory flow rates at 25, 50 and 75% of exhaled forced vital capacity.  
PEF: peak expiratory flow.



**Table A6** Relative importance of variables in final regression models of flow rates (averaged R<sup>2</sup> contribution)

| Spirometric parameter indicative of airway function of | larger conducting airways |                   | peripheral airways |                   |
|--------------------------------------------------------|---------------------------|-------------------|--------------------|-------------------|
|                                                        | PEF                       | FEF <sub>25</sub> | FEF <sub>50</sub>  | FEF <sub>75</sub> |
| <b>Total R<sup>2</sup> of the model</b>                | 0.38                      | 0.24              | 0.18               | 0.13              |
| Sex                                                    | 32.9                      | 21.8              | 18.2               |                   |
| Age                                                    |                           | 2.6               |                    |                   |
| Height                                                 | 55.0                      | 54.8              | 55.5               | 68.3              |
| <b>Early life events</b>                               |                           |                   |                    |                   |
| Parental atopy                                         | 0.7                       |                   |                    |                   |
| Peak weight velocity                                   |                           |                   | 4.0                | 4.1               |
| Lung infections (up to age 3)                          | 0.4                       | 1.3               | 3.3                | 5.1               |
| <b>Environment &amp; lifestyle at age 15</b>           |                           |                   |                    |                   |
| Regular indoor second-hand smoke exposure <sup>1</sup> | 0.6                       |                   |                    | 5.1               |
| Serum vitamin D concentration <sup>2</sup>             |                           |                   |                    |                   |
| Body mass index                                        | 8.2                       | 12.1              | 6.9                |                   |
| <b>Allergic diseases at age 15</b>                     |                           |                   |                    |                   |
| Asthma                                                 |                           | 3.0               | 5.5                | 3.9               |
| <b>Study specific</b>                                  |                           |                   |                    |                   |
| Study center (Wesel vs Munich)                         | 2.1                       | 4.4               | 6.7                | 13.5              |

  

|      |      |      |       |       |       |
|------|------|------|-------|-------|-------|
| < 1% | < 3% | < 5% | < 10% | < 15% | ≥ 15% |
|------|------|------|-------|-------|-------|

Relative importance of variables in regression models adjusted for covariates that remained stable in replication analyses are displayed as normalized percent of R<sup>2</sup> contribution averaged (unweighted) over variable orderings.

<sup>1</sup>at least once a week or more. <sup>2</sup>season-adjusted 25(OH)D concentration.

FEF<sub>25</sub>, FEF<sub>50</sub>, FEF<sub>75</sub>: forced expiratory flow rates at 25, 50 and 75% of exhaled forced vital capacity. PEF: peak expiratory flow.
